# Supplementary material for: Exposome-wide association study of environmental chemical exposures and epigenetic aging in the national health and nutrition examination survey
Source: Aging (Albany NY). 2025 Feb 11;17(2):408–30. doi: 10.18632/aging.206201 (PMC11892924; doi:10.18632/aging.206201)
Supplement: Supplementary Table 1 [file aging-17-206201-s002.xlsx]

## Sheet: TableS1
Supplementary Table 1. Summary of environmental exposures. Sample size from the complete case analysis, percent above limit of detection, and survey-weighted percentiles of exposure.
Exposure	Variable.Description	Dataset	N	detect_freq	mean	SE	quant_00	quant_25	quant_50	quant_75	quant_100
URXTCC	trans-3-(2,2-dichlorovinyl)-2,2-dimethylcyclopropane carboxylic acid	Pesticides - Current Use - Urine (LAB26PP)	410	1	1.13765	0.242606	0.28	0.28	0.28	0.45	60.8
LBXPDELA	p,p'-DDE Lipid Adjusted	Dioxins, Furans, & Coplanar PCBs (LAB28POC)	619	1	961.304	59.1004	21.1	286	584	1140	21400
URXUCS	Cesium, urine (ng/mL)	Metals - Urine (LAB06HM)	600	0.998691	5.66982	0.256878	0.07	2.85	4.85	7.53	36.63
URXUMO	Molybdenum, urine (ng/mL)	Metals - Urine (LAB06HM)	570	0.998628	55.9174	3.36391	0.6	22.9	40.8	75	302.1
URXMEP	Mono-ethyl phthalate (ng/mL)	Phthalates, Phytoestrogens & PAHs - Urine (PHPYPA)	636	0.997468	528.633	58.2814	0.42	34.716	99	294.756	19153.1
LBXTNALA	Trans-nonachlor Lipid Adjusted	Dioxins, Furans, & Coplanar PCBs (LAB28POC)	606	0.990944	48.2976	3.15065	3.3	25	36.4	56.6	584
URXUPB	Lead, urine (ng/mL)	Metals - Urine (LAB06HM)	600	0.989529	1.14126	0.082227	0.07	0.4	0.8	1.5	31.5
URXMBP	Mono-n-butyl phthalate (ng/mL)	Phthalates, Phytoestrogens & PAHs - Urine (PHPYPA)	638	0.988651	41.2153	8.34109	0.6	9.1	16.5	33.9	4357.5
LBXVBM	Bromodichloromethane Result	Volatile Organic Compounds - Blood & Water (LAB04)	107	0.988506	3.04132	0.388797	0.1577	0.814	2.16	3.85	85.9
URXUTL	Thallium, urine (ng/mL)	Metals - Urine (LAB06HM)	591	0.982713	0.187507	0.0079968	0.01	0.09	0.16	0.25	2.82
URXETL	Enterolactone (ng/mL)	Phthalates, Phytoestrogens & PAHs - Urine (PHPYPA)	640	0.974937	701.931	81.0887	0.42	120.03	337	813	22640
LBXVXY	m-/p-Xylene Result	Volatile Organic Compounds - Blood & Water (LAB04)	119	0.972973	0.228758	0.0260962	0.024	0.086	0.177	0.273	2.7
LBXOXYLA	Oxychlordane Lipid Adjusted	Dioxins, Furans, & Coplanar PCBs (LAB28POC)	560	0.971429	30.1244	1.52193	2	17.3	25	37.4	289
URXUBA	Barium, urine (ng/mL)	Metals - Urine (LAB06HM)	566	0.969274	2.27842	0.161067	0.08	0.66	1.4	2.75	42.2
LBXVTO	Toluene Result	Volatile Organic Compounds - Blood & Water (LAB04)	120	0.964602	0.316074	0.048689	0.0177	0.068	0.2	0.4	10.2
URDUCD	Cadmium, urine (ng/mL)	Metals - Urine (LAB06HM)	570	0.961591	0.589618	0.0352864	0.0424	0.2132	0.411525	0.7337	8.21332
URXGNS	Genistein (ng/mL)	Phthalates, Phytoestrogens & PAHs - Urine (PHPYPA)	640	0.953634	139.409	25.5684	0.21	8.9	28.9	94.16	10100
LBXBPB	Lead (ug/dL)	Cadmium, Lead, Mercury, Cotinine & Nutritional Biochemistries (LAB06)	1893	0.953372	2.47011	0.0613727	0.2	1.4	2	2.9	54
LBXVCF	Chloroform Result	Volatile Organic Compounds - Blood & Water (LAB04)	97	0.952941	37.7066	7.01147	1.6263	11.9	21.2	40.7	392
URXUCO	Cobalt, urine (ng/mL)	Metals - Urine (LAB06HM)	600	0.95288	0.403931	0.0195159	0.05	0.18	0.35	0.5	2.94
LBX180LA	PCB180 Lipid Adjusted	Dioxins, Furans, & Coplanar PCBs (LAB28POC)	614	0.952381	53.9984	1.72168	3	32.2	47	68.6	351
URXMZP	Mono-benzyl phthalate (ng/mL)	Phthalates, Phytoestrogens & PAHs - Urine (PHPYPA)	638	0.949559	15.2801	1.77534	0.1527	2.952	7.344	14.4	862.272
URXUSB	Antimony, urine (ng/mL)	Metals - Urine (LAB06HM)	576	0.942779	0.155817	0.0155232	0.03	0.08	0.11	0.16	5.7
URXDAZ	Daidzein (ng/mL)	Phthalates, Phytoestrogens & PAHs - Urine (PHPYPA)	640	0.937343	247.901	47.0941	0.35	15.4	52.6	137	11100
LBXVME	Methyl t-Butyl Ether (MTBE) Result	Volatile Organic Compounds - Blood & Water (LAB04)	96	0.936709	59.1709	16.6254	0.1435	3.86	28.4	53.9	2290
LBX153LA	PCB153 Lipid Adjusted	Dioxins, Furans, & Coplanar PCBs (LAB28POC)	614	0.93565	71.1979	2.20901	3.5	39.5	60.2	90.1	433
URXETD	Enterodiol (ng/mL)	Phthalates, Phytoestrogens & PAHs - Urine (PHPYPA)	636	0.932996	106.601	37.4698	0.57	12.71	36	86.6	18000
LBX170LA	PCB170 Lipid Adjusted	Dioxins, Furans, & Coplanar PCBs (LAB28POC)	586	0.921727	21.6456	0.602981	2.5	13.2	18.6	25.9	129
LBXHXCLA	3,3',4,4',5,5'-hexachlorobiphenyl (hxcb) Lipid Adjusted	Dioxins, Furans, & Coplanar PCBs (LAB28POC)	576	0.920548	32.6788	1.10492	2.8	19.5	29.6	42	172
LBXD05LA	1,2,3,4,6,7,8-Heptachlororodibenzo-p-dioxin (hpcdd) Lipid Adjusted	Dioxins, Furans, & Coplanar PCBs (LAB28POC)	572	0.918733	67.6762	4.17041	3.5	30.5	52.5	84.8	760
LBXD07LA	1,2,3,4,6,7,8,9-Octachlorodibenzo-p-dioxin (ocdd) Lipid Adjusted	Dioxins, Furans, & Coplanar PCBs (LAB28POC)	564	0.917827	546.598	30.9918	52.8	265	417	661	8190
LBX118LA	PCB118 Lipid Adjusted	Dioxins, Furans, & Coplanar PCBs (LAB28POC)	616	0.907455	22.0912	1.04611	2.2	9	16	27.6	269
LBX187LA	PCB187 Lipid Adjusted	Dioxins, Furans, & Coplanar PCBs (LAB28POC)	616	0.90629	15.996	0.468458	2	8.6	12.8	20.5	152
LBX138LA	PCB138 Lipid Adjusted	Dioxins, Furans, & Coplanar PCBs (LAB28POC)	613	0.89433	48.3051	1.65147	3.5	23.6	38.1	62.5	310
LBX074LA	PCB74 Lipid Adjusted	Dioxins, Furans, & Coplanar PCBs (LAB28POC)	616	0.876765	18.0666	0.740526	2.2	9.1	14.6	23.1	144
LBXBCD	Cadmium (ug/L)	Cadmium, Lead, Mercury, Cotinine & Nutritional Biochemistries (LAB06)	1893	0.856667	0.61261	0.0236909	0.2	0.3	0.5	0.7	6
LBXPCBLA	3,3',4,4',5-Pentachlorobiphenyl (pncb) Lipid Adjusted	Dioxins, Furans, & Coplanar PCBs (LAB28POC)	577	0.849521	46.0251	2.79263	1.8	18.3	33.8	55.4	402
LBXD03LA	1,2,3,6,7,8-Hexachlorodibenzo-p-dioxin (hxcdd) Lipid Adjusted	Dioxins, Furans, & Coplanar PCBs (LAB28POC)	577	0.812585	55.4935	3.48099	1.8	27	51	73.4	314
LBXVCM	Dibromochloromethane Result	Volatile Organic Compounds - Blood & Water (LAB04)	110	0.797753	1.44558	0.242234	0.1407	0.1676	0.595	1.6	81.1
LBX156LA	PCB156 Lipid Adjusted	Dioxins, Furans, & Coplanar PCBs (LAB28POC)	609	0.785992	10.5378	0.393335	2	5.9	9.3	13.2	54.1
LBXVBF	Bromoform Result	Volatile Organic Compounds - Blood & Water (LAB04)	102	0.783133	3.83803	1.49366	0.3571	0.676	1.1	2.23	102
LBX099LA	PCB99 Lipid Adjusted	Dioxins, Furans, & Coplanar PCBs (LAB28POC)	606	0.769531	11.9151	0.466591	2	5	8.9	15.2	95.7
LBXF08LA	1,2,3,4,6,7,8-Heptachlorodibenzofuran (hpcdf) Lipid Adjusted	Dioxins, Furans, & Coplanar PCBs (LAB28POC)	549	0.767341	10.4152	0.595267	1.3	5	8.4	13.2	82.6
LBXHPELA	Heptachlor Epoxide Lipid Adjusted	Dioxins, Furans, & Coplanar PCBs (LAB28POC)	556	0.762518	12.6688	0.985296	2.1	5.4	8.9	15.3	912
LBXF03LA	2,3,4,7,8-Pentachlorodibenzofuran (pncdf) Lipid Adjusted	Dioxins, Furans, & Coplanar PCBs (LAB28POC)	577	0.760602	9.06144	0.389948	0.9	4.3	8.2	12.3	38.1
LBXF04LA	1,2,3,4,7,8-Hexachlorodibenzofuran (hxcdf) Lipid Adjusted	Dioxins, Furans, & Coplanar PCBs (LAB28POC)	575	0.757909	7.76072	0.428502	1.3	4.5	6.7	9.7	44.4
URXCPM	3,5,6-trichloropyridinol (ug/L)	Pesticides - Current Use - Urine (LAB26PP)	406	0.74898	3.33017	0.319711	0.28	0.28	1.63	3.79	54.66
URXP09	3-fluoranthene (ng/L)	Phthalates, Phytoestrogens & PAHs - Urine (PHPYPA)	238	0.747664	34.5852	8.3669	2.5	5.5	16.4	29.6	900.1
URXMHP	Mono-(2-ethyl)-hexyl phthalate (ng/mL)	Phthalates, Phytoestrogens & PAHs - Urine (PHPYPA)	638	0.713745	5.80076	0.617666	0.7	0.8	2.5	5.6	140.2
LBXCOT	Cotinine (ng/mL)	Cadmium, Lead, Mercury, Cotinine & Nutritional Biochemistries (LAB06)	1856	0.712363	49.3575	4.84601	0.011	0.035	0.058	1.22	915
LBX146LA	PCB146 Lipid Adjusted	Dioxins, Furans, & Coplanar PCBs (LAB28POC)	612	0.711886	8.63461	0.324698	1.8	4.5	6.6	10.5	68.6
URXOP4	Diethylthiophosphate (ug/L)	Pesticides - Current Use - Urine (LAB26PP)	405	0.694672	1.3199	0.302728	0.06	0.07	0.52	1.51	54.29
LBXVEB	Ethylbenzene Result	Volatile Organic Compounds - Blood & Water (LAB04)	110	0.693069	0.0529591	0.00670079	0.0153	0.017	0.038	0.058	1.2
URXOPM	3-phenoxybenzoic acid (ug/L)	Pesticides - Current Use - Urine (LAB26PP)	411	0.688129	1.42752	0.395479	0.07	0.07	0.26	0.63	69.07
URXDMA	o-Desmethylangolensin (O-DMA) (ng/mL)	Phthalates, Phytoestrogens & PAHs - Urine (PHPYPA)	610	0.67942	50.361	14.2773	0.14	0.28	3.56	17.65	9890
URXEQU	Equol (ng/mL)	Phthalates, Phytoestrogens & PAHs - Urine (PHPYPA)	612	0.669761	27.7251	7.40119	2.12	2.33	7.91	18.3	1424
URXUTU	Tungsten, urine (ng/mL)	Metals - Urine (LAB06HM)	579	0.644414	0.0948291	0.00589095	0.03	0.03	0.06	0.11	1.43
LBXVST	Styrene Result	Volatile Organic Compounds - Blood & Water (LAB04)	118	0.62069	0.0732942	0.0159754	0.0078	0.0212	0.037	0.082	4.22
LBXF05LA	1,2,3,6,7,8-Hexachlorodibenzofuran (hxcdf) Lipid Adjusted	Dioxins, Furans, & Coplanar PCBs (LAB28POC)	580	0.605442	6.01185	0.310482	1.1	2.8	5.1	7.9	29.8
LBXPDTLA	p,p'-DDT Lipid Adjusted	Dioxins, Furans, & Coplanar PCBs (LAB28POC)	578	0.580332	15.4118	1.60905	3.041	5.515	7.425	11.9	3450
LBXVDB	1,4-Dichlorobenzene Result	Volatile Organic Compounds - Blood & Water (LAB04)	106	0.576087	1.44278	0.560733	0.0369	0.0849	0.0994	0.323	51
LBXVBZ	Benzene Result	Volatile Organic Compounds - Blood & Water (LAB04)	112	0.572917	0.102246	0.0165061	0.017	0.017	0.0679	0.12	1.69
URXOP2	Diethylphosphate (ug/L)	Pesticides - Current Use - Urine (LAB26PP)	405	0.55123	2.5817	0.430932	0.14	0.14	0.38	2.8	100.31
URXOP3	Dimethylthiophosphate (ug/L)	Pesticides - Current Use - Urine (LAB26PP)	404	0.544148	8.9829	1.349	0.13	0.28	0.95	6.15	271.5
URXOP1	Dimethylphosphate (ug/L)	Pesticides - Current Use - Urine (LAB26PP)	NA	0.491803	2.65491	0.320713	0.35	0.35	0.41	2.76	67.26
LBX183LA	PCB183 Lipid Adjusted	Dioxins, Furans, & Coplanar PCBs (LAB28POC)	NA	0.491003	5.54994	0.137428	2	3.4	4.5	6.6	41.2
LBXVOX	o-Xylene Result	Volatile Organic Compounds - Blood & Water (LAB04)	NA	0.470085	0.0656608	0.00643329	0.0211	0.0346	0.0346	0.0798	1.1
URXPAR	Paranitrophenol (ug/L)	Pesticides - Current Use - Urine (LAB26PP)	NA	0.410309	1.18732	0.238791	0.07	0.07	0.28	1.12	72
LBXD04LA	1,2,3,7,8,9-Hexachlorodibenzo-p-dioxin (hxcdd) Lipid Adjusted	Dioxins, Furans, & Coplanar PCBs (LAB28POC)	NA	0.400826	7.13723	0.379755	1.4	3.3	5.3	9	49.1
URXOP5	Dimethyldithiophosphate (ug/L)	Pesticides - Current Use - Urine (LAB26PP)	NA	0.394251	2.56938	0.611639	0.06	0.07	0.07	0.92	99
URXCCC	cis-3-(2,2-dichlorovinyl)-2,2-dimethylcyclopropane carboxylic acid	Pesticides - Current Use - Urine (LAB26PP)	NA	0.389899	0.460341	0.101329	0.07	0.07	0.07	0.26	22.2
LBXV4C	Tetrachloroethene Result	Volatile Organic Compounds - Blood & Water (LAB04)	NA	0.384615	0.200413	0.099699	0.0145	0.0339	0.0339	0.071	9.7
LBXD01LA	1,2,3,7,8-Pentachlorodibenzo-p-dioxin (pncdd) Lipid Adjusted	Dioxins, Furans, & Coplanar PCBs (LAB28POC)	NA	0.380759	5.85051	0.336305	0.7	2.2	3.4	7.1	50.8
LBX105LA	PCB105 Lipid Adjusted	Dioxins, Furans, & Coplanar PCBs (LAB28POC)	NA	0.33634	5.19053	0.184542	1.8	3.2	4.1	5.6	62.3
LBXMIRLA	Mirex Lipid Adjusted	Dioxins, Furans, & Coplanar PCBs (LAB28POC)	NA	0.330677	16.4958	4.8923	1.3	3.5	4.5	6.5	631
LBX178LA	PCB178 Lipid Adjusted	Dioxins, Furans, & Coplanar PCBs (LAB28POC)	NA	0.320876	4.5758	0.110838	0.6	3.2	4	5.2	33.9
LBX177LA	PCB177 Lipid Adjusted	Dioxins, Furans, & Coplanar PCBs (LAB28POC)	NA	0.284031	4.41865	0.11383	1.3	3.1	3.8	4.9	29.8
URXOP6	Diethyldithiophosphate (ug/L)	Pesticides - Current Use - Urine (LAB26PP)	NA	0.273101	0.204336	0.0297282	0.04	0.07	0.07	0.09	8.4
LBX172LA	PCB172 Lipid Adjusted	Dioxins, Furans, & Coplanar PCBs (LAB28POC)	NA	0.22339	4.3209	0.126695	1.2	3	3.7	4.8	31.6
URX24D	2,4-D (ug/L)	Pesticides - Current Use - Urine (LAB26PP)	NA	0.211297	0.356047	0.0564899	0.01	0.14	0.14	0.2	6.91
LBX167LA	PCB167 Lipid Adjusted	Dioxins, Furans, & Coplanar PCBs (LAB28POC)	NA	0.180285	4.07581	0.0777237	0.9	3.1	3.7	4.5	21.3
LBXVCT	Carbon Tetrachloride Result	Volatile Organic Compounds - Blood & Water (LAB04)	NA	0.117647	0.00824233	0.00143615	0.0035	0.0035	0.007	0.0071	0.0528
LBX066LA	PCB66 Lipid Adjusted	Dioxins, Furans, & Coplanar PCBs (LAB28POC)	NA	0.111111	5.25343	0.2992	1.7	3.7	4.5	5.4	77.4
LBX157LA	PCB157 Lipid Adjusted	Dioxins, Furans, & Coplanar PCBs (LAB28POC)	NA	0.103627	3.79786	0.0736184	0.6	3	3.5	4.2	13.1
URXDIZ	Oxypyrimidine (ug/L)	Pesticides - Current Use - Urine (LAB26PP)	NA	0.101626	0.641981	0.0398475	0.14	0.49	0.49	0.49	14
LBXHCBLA	Hexachlorobenzene Lipid Adjusted	Dioxins, Furans, & Coplanar PCBs (LAB28POC)	NA	0.09375	22.1058	1.05195	3.9	9.4	12.6	34.3	381
LBXTCDLA	2,3,7,8-Tetrachlorodienzo-p-dioxin (tcdd) Lipid Adjusted	Dioxins, Furans, & Coplanar PCBs (LAB28POC)	NA	0.0930233	2.78236	0.0908157	0.5	1.8	2.3	3.2	13.1
URXDEE	DEET (ug/L)	Pesticides - Current Use - Urine (LAB26PP)	NA	0.0929293	0.109772	0.0274061	0.01	0.07	0.07	0.07	10.24
URXMCP	Mono-cyclohexyl phthalate (ng/mL)	Phthalates, Phytoestrogens & PAHs - Urine (PHPYPA)	NA	0.0882724	1.02869	0.0952229	0.4264	0.4264	0.4264	1.2792	17.085
LBXF07LA	2,3,4,6,7,8,-Hexchlorodibenzofuran (hxcdf) Lipid Adjusted	Dioxins, Furans, & Coplanar PCBs (LAB28POC)	NA	0.0879121	2.73488	0.0898595	0.7	1.8	2.3	3.3	12.5
URXMNP	Mono-isononyl phthalate (ng/mL)	Phthalates, Phytoestrogens & PAHs - Urine (PHPYPA)	NA	0.0605296	1.36152	0.190002	0.8712	0.8712	0.8712	0.8712	48.356
URXMOP	Mono-n-octyl phthalate (ng/mL)	Phthalates, Phytoestrogens & PAHs - Urine (PHPYPA)	NA	0.0605296	1.55249	0.218765	1.0691	1.0691	1.1879	1.1879	63.336
LBX052LA	PCB52 Lipid Adj (ng/g)	Dioxins, Furans, & Coplanar PCBs (LAB28POC)	NA	0.0557823	5.78082	0.187673	1.4	3.9	5.2	7.1	31.4
LBX101LA	PCB101 Lipid Adjusted	Dioxins, Furans, & Coplanar PCBs (LAB28POC)	NA	0.0307298	5.8829	0.376388	0.6	3.1	4.5	7.8	84.9
URXUPT	Platinum, urine (ng/mL)	Metals - Urine (LAB06HM)	NA	0.0301047	0.0388279	0.00790972	0.03	0.03	0.03	0.03	4.3
LBXVTC	Trichloroethene Result	Volatile Organic Compounds - Blood & Water (LAB04)	NA	0.027027	0.00973524	0.000936045	0.0066	0.0074	0.0085	0.0085	0.122
LBXGHCLA	Gamma-hexachlorocyclohexane Lipid Adjusted	Dioxins, Furans, & Coplanar PCBs (LAB28POC)	NA	0.0243572	3.91909	0.0970146	0.6	3	3.5	4.5	36.2
URXUBE	Beryllium, urine (ng/mL)	Metals - Urine (LAB06HM)	NA	0.0235602	0.091591	0.000542837	0.09	0.09	0.09	0.09	0.17
LBXODTLA	o,p'-DDT Lipid Adjusted	Dioxins, Furans, & Coplanar PCBs (LAB28POC)	NA	0.0183099	6.08794	0.230329	1.1	4.8	5.5	6.6	132
LBX128LA	PCB128 Lipid Adjusted	Dioxins, Furans, & Coplanar PCBs (LAB28POC)	NA	0.0115681	3.60129	0.0727399	0.6	2.9	3.4	4	16.6
URXCBF	Carbofuranphenol (ug/L)	Pesticides - Current Use - Urine (LAB26PP)	NA	0.0101833	0.262268	0.0160244	0.14	0.28	0.28	0.28	2.2
URX4FP	4-fluoro-3-phenoxybenzoic acid (ug/L)	Pesticides - Current Use - Urine (LAB26PP)	NA	0.00607287	0.144921	0.00394808	0.14	0.14	0.14	0.14	1
LBXF10LA	1,2,3,4,6,7,8,9-Octachlorodibenzofuran (ocdf) Lipid Adjusted	Dioxins, Furans, & Coplanar PCBs (LAB28POC)	NA	0.00559441	7.84452	0.236291	2	5.7	7.2	9	24.3
LBXF02LA	1,2,3,7,8-Pentachlorodibenzofuran (pncdf) Lipid Adjusted	Dioxins, Furans, & Coplanar PCBs (LAB28POC)	NA	0.00542005	2.46237	0.064045	0.6	1.8	2.2	3	9.2
URXCB3	cis-3-(2,2-dibromovinyl)-2,2-dimethylcyclopropane carboxylic acid	Pesticides - Current Use - Urine (LAB26PP)	NA	0.00416667	0.0703605	0.00030212	0.07	0.07	0.07	0.07	0.84
URXATZ	Atrazine mercapturate (ug/L)	Pesticides - Current Use - Urine (LAB26PP)	NA	0.00413223	0.164223	0.00640246	0.01	0.21	0.21	0.21	0.38
LBXTC2LA	3,4,4',5-Tetrachlorobiphenyl (tcb) Lipid Adjusted	Dioxins, Furans, & Coplanar PCBs (LAB28POC)	NA	0.00413223	12.2897	0.499034	2.3	8.1	10.9	15.3	64
URXPPX	2-isopropoxyphenol (ug/L)	Pesticides - Current Use - Urine (LAB26PP)	NA	0.00411523	0.413101	0.0189067	0.28	0.28	0.28	0.78	2.27
LBXF01LA	2,3,7,8,-Tetrachlorodibenzofuran (tcdf) Lipid Adjusted	Dioxins, Furans, & Coplanar PCBs (LAB28POC)	NA	0.00408719	2.2188	0.0606016	0.4	1.6	2	2.7	8.3
URX25T	2,4,5-T (ug/L)	Pesticides - Current Use - Urine (LAB26PP)	NA	0	0.0654604	0.00154688	0.01	0.07	0.07	0.07	0.15
LBXF06LA	1,2,3,7,8,9-Hexachlorodibenzofuran (hxcdf) Lipid Adjusted	Dioxins, Furans, & Coplanar PCBs (LAB28POC)	NA	0	2.5154	0.0785111	0.6	1.8	2.3	2.9	8.5
