# Supplementary material for: Exposome-wide association study of environmental chemical exposures and epigenetic aging in the national health and nutrition examination survey
Source: Aging (Albany NY). 2025 Feb 11;17(2):408–30. doi: 10.18632/aging.206201 (PMC11892924; doi:10.18632/aging.206201)
Supplement: Supplementary Table 2 [file aging-17-206201-s003.xlsx]

## Sheet: TableS2
Supplementary Table 2. Extended Primary Model Summary Table. Effect estimates, 95% Confidence Intervals (CI), raw p-values, and Bonferroni-adjusted p-values for each exposure exhibiting a raw p-value < 0.05 from the no cell-adjustment and cell-adjusted models.
Model	Exposure	Clock	Estimate	95% CI	P Value (Raw)	P Value (Bonferroni)
Cell-Adjusted	Cadmium	GrimAge	1.12792	( 0.80, 1.46)	0.000312274	0.0199855
Cell-Adjusted	Cadmium	GrimAge2	1.12392	( 0.75, 1.50)	0.000612654	0.0392098
Cell-Adjusted	Cadmium	DunedinPoAm	0.0151837	( 0.01, 0.02)	0.000865532	0.0553941
Cell-Adjusted	Cotinine	GrimAge2	1.2538	( 0.58, 1.93)	0.00499574	0.319727
Cell-Adjusted	Cotinine	DunedinPoAm	0.0230537	( 0.01, 0.04)	0.00513465	0.328617
Cell-Adjusted	Cadmium	DNAmTL	-0.0289342	(-0.04, -0.01)	0.0056279	0.360186
Cell-Adjusted	Cadmium, urine	GrimAge	1.19699	( 0.55, 1.84)	0.00666594	0.42662
Cell-Adjusted	Cadmium, urine	GrimAge2	1.38426	( 0.63, 2.14)	0.00697797	0.44659
Cell-Adjusted	Cotinine	GrimAge	1.14905	( 0.47, 1.83)	0.00754409	0.482821
Cell-Adjusted	PCB118	DunedinPoAm	-0.0137168	(-0.02, 0.00)	0.0161575	1
Cell-Adjusted	PCB118	GrimAge	-0.537964	(-0.97, -0.11)	0.0230982	1
Cell-Adjusted	PCB118	GrimAge2	-0.596148	(-1.08, -0.11)	0.0247019	1
Cell-Adjusted	Tungsten, urine	PhenoAge	0.936748	( 0.19, 1.68)	0.0248988	1
Cell-Adjusted	Lead	GrimAge	0.412464	( 0.04, 0.78)	0.0354474	1
Cell-Adjusted	PCB146	DunedinPoAm	-0.0111815	(-0.02, 0.00)	0.0365151	1
Cell-Adjusted	Antimony, urine	Horvath	-0.721282	(-1.38, -0.07)	0.0376022	1
Cell-Adjusted	Cotinine	PhenoAge	0.794662	( 0.06, 1.53)	0.0389913	1
Cell-Adjusted	Equol	GrimAge	-0.593539	(-1.13, -0.06)	0.0392309	1
Cell-Adjusted	Cadmium, urine	DunedinPoAm	0.0168373	( 0.00, 0.03)	0.0432355	1
Cell-Adjusted	1,2,3,4,6,7,8,9-Octachlorodibenzo-p-dioxin (ocdd)	Horvath	-0.711817	(-1.39, -0.03)	0.0433038	1
Cell-Adjusted	PCB74	DunedinPoAm	-0.0110873	(-0.02, 0.00)	0.0452391	1
Cell-Adjusted	Cadmium	PhenoAge	0.614111	( 0.02, 1.21)	0.0457056	1
Cell-Adjusted	PCB99	GrimAge2	-0.378944	(-0.75, 0.00)	0.0488028	1
No Cell-Adjustment	Cadmium	GrimAge	1.23248	( 0.91, 1.55)	3.62737e-06	0.000232151
No Cell-Adjustment	Cadmium	GrimAge2	1.26914	( 0.88, 1.65)	1.61926e-05	0.00103632
No Cell-Adjustment	Cadmium	DunedinPoAm	0.0204585	( 0.01, 0.03)	2.3365e-05	0.00149536
No Cell-Adjustment	Cotinine	DunedinPoAm	0.0266683	( 0.01, 0.04)	0.000631143	0.0403932
No Cell-Adjustment	Cotinine	GrimAge2	1.39777	( 0.74, 2.05)	0.000653463	0.0418216
No Cell-Adjustment	Cadmium	DNAmTL	-0.0290606	(-0.04, -0.02)	0.0008224	0.0526336
No Cell-Adjustment	Cadmium, urine	GrimAge2	1.43066	( 0.75, 2.11)	0.000852878	0.0545842
No Cell-Adjustment	Cadmium, urine	GrimAge	1.19143	( 0.60, 1.79)	0.00120257	0.0769645
No Cell-Adjustment	Cotinine	GrimAge	1.25034	( 0.61, 1.90)	0.00132871	0.0850371
No Cell-Adjustment	Cadmium	PhenoAge	0.831381	( 0.34, 1.32)	0.0034335	0.219744
No Cell-Adjustment	Tungsten, urine	DunedinPoAm	0.0150834	( 0.01, 0.02)	0.00677822	0.433806
No Cell-Adjustment	PCB118	DunedinPoAm	-0.0151376	(-0.03, 0.00)	0.00750954	0.480611
No Cell-Adjustment	Lead	GrimAge	0.497415	( 0.14, 0.86)	0.0111156	0.711397
No Cell-Adjustment	Tungsten, urine	PhenoAge	0.957621	( 0.26, 1.65)	0.0119873	0.767186
No Cell-Adjustment	o-Desmethylangolensin (O-DMA)	DunedinPoAm	-0.0123356	(-0.02, 0.00)	0.0138071	0.883657
No Cell-Adjustment	Equol	GrimAge	-0.517498	(-0.90, -0.13)	0.0142457	0.911723
No Cell-Adjustment	PCB146	DunedinPoAm	-0.0134817	(-0.02, 0.00)	0.0151517	0.96971
No Cell-Adjustment	Antimony, urine	Horvath	-0.885812	(-1.56, -0.21)	0.0155668	0.996277
No Cell-Adjustment	Cotinine	PhenoAge	0.875876	( 0.19, 1.56)	0.0173285	1
No Cell-Adjustment	3,5,6-trichloropyridinol	Horvath	0.768775	( 0.15, 1.39)	0.0201216	1
No Cell-Adjustment	Lead	GrimAge2	0.46665	( 0.08, 0.85)	0.0214383	1
No Cell-Adjustment	PCB138	DunedinPoAm	-0.0112813	(-0.02, 0.00)	0.0217725	1
No Cell-Adjustment	Heptachlor Epoxide	PhenoAge	0.694621	( 0.12, 1.27)	0.0227004	1
No Cell-Adjustment	Mono-benzyl phthalate	Hannum	1.03294	( 0.17, 1.89)	0.0235087	1
No Cell-Adjustment	3,3',4,4',5-Pentachlorobiphenyl (pncb)	DunedinPoAm	-0.0141282	(-0.03, 0.00)	0.0242068	1
No Cell-Adjustment	PCB118	GrimAge	-0.5661	(-1.05, -0.09)	0.0246242	1
No Cell-Adjustment	Mono-benzyl phthalate	SkinBlood	0.736166	( 0.11, 1.36)	0.0258294	1
No Cell-Adjustment	1,2,3,4,6,7,8,9-Octachlorodibenzo-p-dioxin (ocdd)	Horvath	-0.705289	(-1.31, -0.10)	0.0265271	1
No Cell-Adjustment	Equol	GrimAge2	-0.467213	(-0.87, -0.07)	0.0268692	1
No Cell-Adjustment	Cadmium, urine	DunedinPoAm	0.0208456	( 0.00, 0.04)	0.0279155	1
No Cell-Adjustment	PCB118	GrimAge2	-0.624514	(-1.18, -0.07)	0.0299068	1
No Cell-Adjustment	o-Desmethylangolensin (O-DMA)	GrimAge2	-0.48465	(-0.92, -0.05)	0.0339357	1
No Cell-Adjustment	Daidzein	Hannum	0.424273	( 0.04, 0.81)	0.0348302	1
No Cell-Adjustment	PCB153	DunedinPoAm	-0.00993509	(-0.02, 0.00)	0.0376896	1
No Cell-Adjustment	PCB99	GrimAge2	-0.415116	(-0.80, -0.03)	0.0377793	1
No Cell-Adjustment	Cotinine	DNAmTL	-0.0251474	(-0.05, 0.00)	0.0441275	1
No Cell-Adjustment	Cadmium, urine	Horvath	-1.10943	(-2.19, -0.03)	0.0452173	1
No Cell-Adjustment	trans-3-(2,2-dichlorovinyl)-2,2-dimethylcyclopropane carboxylic acid	PhenoAge	-0.579633	(-1.15, -0.01)	0.0456293	1
