# Supplementary material for: Exposome-wide association study of environmental chemical exposures and epigenetic aging in the national health and nutrition examination survey
Source: Aging (Albany NY). 2025 Feb 11;17(2):408–30. doi: 10.18632/aging.206201 (PMC11892924; doi:10.18632/aging.206201)
Supplement: Supplementary Table 3 [file aging-17-206201-s004.xlsx]

## Sheet: TableS3
Supplementary Table 3. Extended Cotinine Sensitivity Model Summary Table. Effect estimates, 95% Confidence Intervals (CI), raw p-values, and Bonferroni-adjusted p-values for each exposure exhibiting a raw p-value < 0.05 from the no cell-adjustment and cell-adjusted models.
Model	Exposure	Clock	Estimate	95% CI	P Value (Raw)	P Value (Bonferroni)
Cell-Adjusted	Cadmium	GrimAge	1.86225	( 1.45, 2.27)	3.25489e-05	0.00205058
Cell-Adjusted	Cadmium	GrimAge2	1.87708	( 1.41, 2.34)	6.37916e-05	0.00401887
Cell-Adjusted	Cadmium	DunedinPoAm	0.0275775	( 0.02, 0.03)	9.07023e-05	0.00571424
Cell-Adjusted	Cadmium, urine	GrimAge	2.21906	( 1.52, 2.92)	0.000443048	0.027912
Cell-Adjusted	Cadmium, urine	GrimAge2	2.377	( 1.53, 3.22)	0.000789522	0.0497399
Cell-Adjusted	Lead	GrimAge	0.657653	( 0.37, 0.94)	0.00133862	0.0843331
Cell-Adjusted	Cadmium, urine	DunedinPoAm	0.031142	( 0.02, 0.04)	0.00162099	0.102122
Cell-Adjusted	1,2,3,4,6,7,8-Heptachlororodibenzo-p-dioxin (hpcdd)	GrimAge	-1.29881	(-1.91, -0.69)	0.00193912	0.122165
Cell-Adjusted	PCB118	GrimAge	-1.00994	(-1.48, -0.54)	0.00198585	0.125108
Cell-Adjusted	PCB118	GrimAge2	-1.09304	(-1.61, -0.57)	0.0020918	0.131784
Cell-Adjusted	1,2,3,4,6,7,8-Heptachlororodibenzo-p-dioxin (hpcdd)	GrimAge2	-1.30222	(-1.97, -0.64)	0.00307387	0.193654
Cell-Adjusted	Cadmium	DNAmTL	-0.035092	(-0.05, -0.02)	0.00334046	0.210449
Cell-Adjusted	Lead	GrimAge2	0.578191	( 0.27, 0.89)	0.00400129	0.252081
Cell-Adjusted	PCB118	DunedinPoAm	-0.0219067	(-0.03, -0.01)	0.00496217	0.312617
Cell-Adjusted	1,2,3,4,6,7,8-Heptachlororodibenzo-p-dioxin (hpcdd)	DunedinPoAm	-0.0238555	(-0.04, -0.01)	0.00789853	0.497607
Cell-Adjusted	3,3',4,4',5-Pentachlorobiphenyl (pncb)	DunedinPoAm	-0.0181389	(-0.03, -0.01)	0.0128415	0.809014
Cell-Adjusted	Equol	GrimAge	-0.63781	(-1.07, -0.21)	0.0147463	0.929016
Cell-Adjusted	Antimony, urine	Horvath	-0.818682	(-1.42, -0.22)	0.0171686	1
Cell-Adjusted	3,3',4,4',5-Pentachlorobiphenyl (pncb)	GrimAge	-0.723596	(-1.27, -0.17)	0.0181834	1
Cell-Adjusted	3,3',4,4',5-Pentachlorobiphenyl (pncb)	GrimAge2	-0.704311	(-1.24, -0.16)	0.0187165	1
Cell-Adjusted	Equol	GrimAge2	-0.60074	(-1.05, -0.15)	0.0204773	1
Cell-Adjusted	Cadmium, urine	DNAmTL	-0.0500591	(-0.09, -0.01)	0.0216943	1
Cell-Adjusted	PCB74	GrimAge	-0.658577	(-1.20, -0.12)	0.024897	1
Cell-Adjusted	Tungsten, urine	PhenoAge	0.885931	( 0.13, 1.64)	0.0295042	1
Cell-Adjusted	PCB74	GrimAge2	-0.736521	(-1.37, -0.10)	0.0296309	1
Cell-Adjusted	PCB74	DunedinPoAm	-0.0161198	(-0.03, 0.00)	0.0307297	1
Cell-Adjusted	Equol	DNAmTL	0.0288122	( 0.00, 0.05)	0.0338009	1
Cell-Adjusted	Equol	DunedinPoAm	-0.00834081	(-0.02, 0.00)	0.0396631	1
Cell-Adjusted	1,2,3,4,6,7,8,9-Octachlorodibenzo-p-dioxin (ocdd)	Horvath	-0.721556	(-1.40, -0.05)	0.0398919	1
Cell-Adjusted	Heptachlor Epoxide	PhenoAge	0.728641	( 0.03, 1.42)	0.0429161	1
Cell-Adjusted	1,2,3,4,7,8-Hexachlorodibenzofuran (hxcdf)	DunedinPoAm	-0.011006	(-0.02, 0.00)	0.0433812	1
Cell-Adjusted	PCB99	DunedinPoAm	-0.0101363	(-0.02, 0.00)	0.0454456	1
Cell-Adjusted	Cadmium	PhenoAge	0.642872	( 0.02, 1.27)	0.0456101	1
Cell-Adjusted	PCB146	DunedinPoAm	-0.0116581	(-0.02, 0.00)	0.0495231	1
No Cell-Adjustment	Cadmium	GrimAge	1.93655	( 1.54, 2.33)	1.69084e-07	1.06523e-05
No Cell-Adjustment	Cadmium	GrimAge2	1.97428	( 1.52, 2.43)	6.7959e-07	4.28142e-05
No Cell-Adjustment	Cadmium	DunedinPoAm	0.0311016	( 0.02, 0.04)	8.13073e-07	5.12236e-05
No Cell-Adjustment	Cadmium, urine	GrimAge	2.14139	( 1.54, 2.75)	8.34453e-06	0.000525705
No Cell-Adjustment	Cadmium, urine	GrimAge2	2.3242	( 1.58, 3.07)	2.64012e-05	0.00166328
No Cell-Adjustment	Lead	GrimAge	0.732072	( 0.46, 1.01)	8.79965e-05	0.00554378
No Cell-Adjustment	1,2,3,4,6,7,8-Heptachlororodibenzo-p-dioxin (hpcdd)	GrimAge	-1.20557	(-1.70, -0.71)	0.000200514	0.0126324
No Cell-Adjustment	Cadmium, urine	DunedinPoAm	0.031725	( 0.02, 0.04)	0.000234885	0.0147977
No Cell-Adjustment	Lead	GrimAge2	0.6745	( 0.37, 0.98)	0.000389687	0.0245503
No Cell-Adjustment	Cadmium	DNAmTL	-0.0359441	(-0.05, -0.02)	0.000434566	0.0273776
No Cell-Adjustment	PCB118	GrimAge	-1.05588	(-1.55, -0.57)	0.00052181	0.032874
No Cell-Adjustment	1,2,3,4,6,7,8-Heptachlororodibenzo-p-dioxin (hpcdd)	GrimAge2	-1.18061	(-1.74, -0.62)	0.000607377	0.0382647
No Cell-Adjustment	PCB118	GrimAge2	-1.13597	(-1.69, -0.58)	0.000750274	0.0472672
No Cell-Adjustment	PCB118	DunedinPoAm	-0.0233224	(-0.04, -0.01)	0.00143522	0.090419
No Cell-Adjustment	1,2,3,4,6,7,8-Heptachlororodibenzo-p-dioxin (hpcdd)	DunedinPoAm	-0.0238413	(-0.04, -0.01)	0.00286739	0.180645
No Cell-Adjustment	3,3',4,4',5-Pentachlorobiphenyl (pncb)	DunedinPoAm	-0.0207003	(-0.03, -0.01)	0.0033204	0.209185
No Cell-Adjustment	3,3',4,4',5-Pentachlorobiphenyl (pncb)	GrimAge2	-0.74783	(-1.21, -0.28)	0.00443693	0.279527
No Cell-Adjustment	3,3',4,4',5-Pentachlorobiphenyl (pncb)	GrimAge	-0.755617	(-1.23, -0.28)	0.00451737	0.284594
No Cell-Adjustment	Antimony, urine	Horvath	-0.998248	(-1.64, -0.35)	0.00581695	0.366468
No Cell-Adjustment	Equol	GrimAge	-0.503682	(-0.85, -0.16)	0.0082048	0.516902
No Cell-Adjustment	Heptachlor Epoxide	PhenoAge	0.775971	( 0.24, 1.31)	0.00880531	0.554734
No Cell-Adjustment	Cadmium	PhenoAge	0.756533	( 0.19, 1.32)	0.0125046	0.78779
No Cell-Adjustment	trans-3-(2,2-dichlorovinyl)-2,2-dimethylcyclopropane carboxylic acid	DunedinPoAm	-0.0126948	(-0.02, 0.00)	0.013271	0.836076
No Cell-Adjustment	Daidzein	Hannum	0.496878	( 0.13, 0.87)	0.0135502	0.853662
No Cell-Adjustment	Tungsten, urine	PhenoAge	0.899771	( 0.19, 1.61)	0.0171092	1
No Cell-Adjustment	o-Desmethylangolensin (O-DMA)	DunedinPoAm	-0.0154245	(-0.03, 0.00)	0.0187442	1
No Cell-Adjustment	Equol	GrimAge2	-0.44217	(-0.79, -0.09)	0.0190103	1
No Cell-Adjustment	2,3,4,7,8-Pentachlorodibenzofuran (pncdf)	DunedinPoAm	-0.0132796	(-0.02, 0.00)	0.0209297	1
No Cell-Adjustment	3,5,6-trichloropyridinol	Horvath	0.682604	( 0.12, 1.25)	0.0223477	1
No Cell-Adjustment	o-Desmethylangolensin (O-DMA)	GrimAge2	-0.678146	(-1.24, -0.12)	0.0223872	1
No Cell-Adjustment	Cadmium, urine	Horvath	-1.10375	(-2.04, -0.16)	0.0255066	1
No Cell-Adjustment	2,3,4,7,8-Pentachlorodibenzofuran (pncdf)	GrimAge2	-0.555795	(-1.05, -0.06)	0.0297092	1
No Cell-Adjustment	PCB146	DunedinPoAm	-0.0140168	(-0.03, 0.00)	0.0311518	1
No Cell-Adjustment	Mono-benzyl phthalate	Hannum	0.927111	( 0.10, 1.76)	0.0317242	1
No Cell-Adjustment	1,2,3,4,6,7,8,9-Octachlorodibenzo-p-dioxin (ocdd)	Horvath	-0.713468	(-1.36, -0.07)	0.0326111	1
No Cell-Adjustment	Lead	DunedinPoAm	0.00865265	( 0.00, 0.02)	0.0366762	1
No Cell-Adjustment	Cobalt, urine	DunedinPoAm	0.0129885	( 0.00, 0.03)	0.0368854	1
No Cell-Adjustment	trans-3-(2,2-dichlorovinyl)-2,2-dimethylcyclopropane carboxylic acid	PhenoAge	-0.633306	(-1.22, -0.04)	0.037704	1
No Cell-Adjustment	trans-3-(2,2-dichlorovinyl)-2,2-dimethylcyclopropane carboxylic acid	GrimAge	-0.464527	(-0.90, -0.03)	0.0381041	1
No Cell-Adjustment	PCB99	DunedinPoAm	-0.0117245	(-0.02, 0.00)	0.0384772	1
No Cell-Adjustment	Dimethylthiophosphate	Hannum	0.665537	( 0.04, 1.29)	0.0390763	1
No Cell-Adjustment	trans-3-(2,2-dichlorovinyl)-2,2-dimethylcyclopropane carboxylic acid	GrimAge2	-0.464351	(-0.91, -0.02)	0.04114	1
No Cell-Adjustment	2,3,4,7,8-Pentachlorodibenzofuran (pncdf)	GrimAge	-0.513518	(-1.01, -0.02)	0.0419921	1
No Cell-Adjustment	Mono-benzyl phthalate	SkinBlood	0.661914	( 0.03, 1.30)	0.042484	1
No Cell-Adjustment	Cadmium, urine	DNAmTL	-0.0426496	(-0.08, 0.00)	0.0431986	1
No Cell-Adjustment	PCB138	Hannum	-0.61351	(-1.22, 0.00)	0.0486566	1
No Cell-Adjustment	PCB74	GrimAge	-0.631384	(-1.26, 0.00)	0.0495538	1
