# Supplementary material for: Exposome-wide association study of environmental chemical exposures and epigenetic aging in the national health and nutrition examination survey
Source: Aging (Albany NY). 2025 Feb 11;17(2):408–30. doi: 10.18632/aging.206201 (PMC11892924; doi:10.18632/aging.206201)
Supplement: Supplementary Table 4 [file aging-17-206201-s005.xlsx]

## Sheet: TableS4
Supplementary Table 4. Extended Covariate Imputation Sensitivity Model Summary Table. Effect estimates, 95% Confidence Intervals (CI), raw p-values, and Bonferroni-adjusted p-values for each exposure exhibiting a raw p-value < 0.05 from the no cell-adjustment and cell-adjusted models.
Model	Exposure	Clock	Estimate	95% CI	P Value (Raw)	P Value (Bonferroni)
Cell-Adjusted	Cadmium	GrimAge	1.15342	( 0.78, 1.52)	0.00117699	0.0753271
Cell-Adjusted	Cadmium	GrimAge2	1.13986	( 0.72, 1.56)	0.00202101	0.129345
Cell-Adjusted	Cadmium	DunedinPoAm	0.0156543	( 0.01, 0.02)	0.00259632	0.166165
Cell-Adjusted	Cotinine	DunedinPoAm	0.0227329	( 0.01, 0.04)	0.00853535	0.546262
Cell-Adjusted	Cotinine	GrimAge2	1.23115	( 0.53, 1.93)	0.008893	0.569152
Cell-Adjusted	Cadmium	DNAmTL	-0.027516	(-0.04, -0.01)	0.0118038	0.755445
Cell-Adjusted	Cadmium, urine	GrimAge2	1.56509	( 0.67, 2.46)	0.0121964	0.780571
Cell-Adjusted	Cadmium, urine	GrimAge	1.31521	( 0.55, 2.08)	0.0126467	0.809389
Cell-Adjusted	Cotinine	GrimAge	1.12935	( 0.41, 1.85)	0.0128614	0.823131
Cell-Adjusted	Lead	GrimAge	0.443127	( 0.10, 0.79)	0.0246934	1
Cell-Adjusted	Tungsten, urine	PhenoAge	1.13557	( 0.20, 2.07)	0.0308882	1
Cell-Adjusted	Cadmium, urine	PhenoAge	1.04151	( 0.17, 1.91)	0.0321471	1
Cell-Adjusted	Cotinine	PhenoAge	0.731933	( 0.04, 1.42)	0.0420673	1
Cell-Adjusted	Equol	GrimAge	-0.506103	(-0.98, -0.03)	0.043673	1
Cell-Adjusted	Lead	GrimAge2	0.388131	( 0.01, 0.76)	0.0454445	1
Cell-Adjusted	Equol	DNAmTL	0.0295782	( 0.00, 0.06)	0.0461321	1
Cell-Adjusted	Equol	GrimAge2	-0.512482	(-1.01, -0.02)	0.0461683	1
Cell-Adjusted	Cadmium	PhenoAge	0.556491	( 0.00, 1.11)	0.049428	1
No Cell-Adjustment	Cadmium	GrimAge	1.28034	( 0.95, 1.61)	7.51417e-06	0.000480907
No Cell-Adjustment	Cadmium	GrimAge2	1.31068	( 0.92, 1.70)	2.9536e-05	0.0018903
No Cell-Adjustment	Cadmium	DunedinPoAm	0.0206763	( 0.01, 0.03)	4.09449e-05	0.00262048
No Cell-Adjustment	Cadmium, urine	GrimAge2	1.67176	( 1.01, 2.34)	0.000364718	0.0233419
No Cell-Adjustment	Cadmium, urine	GrimAge	1.35532	( 0.78, 1.93)	0.000547425	0.0350352
No Cell-Adjustment	Cotinine	DunedinPoAm	0.02498	( 0.01, 0.04)	0.00088603	0.0567059
No Cell-Adjustment	Cotinine	GrimAge2	1.32	( 0.68, 1.96)	0.00107744	0.0689559
No Cell-Adjustment	Cadmium	DNAmTL	-0.0291609	(-0.04, -0.01)	0.00123009	0.0787257
No Cell-Adjustment	Cotinine	GrimAge	1.18842	( 0.56, 1.82)	0.00192502	0.123201
No Cell-Adjustment	Cadmium	PhenoAge	0.805176	( 0.37, 1.24)	0.00222668	0.142508
No Cell-Adjustment	Tungsten, urine	PhenoAge	1.19448	( 0.49, 1.90)	0.00426928	0.273234
No Cell-Adjustment	Tungsten, urine	DunedinPoAm	0.014252	( 0.01, 0.02)	0.00666519	0.426572
No Cell-Adjustment	Lead	GrimAge	0.502482	( 0.17, 0.84)	0.00780478	0.499506
No Cell-Adjustment	PCB146	DunedinPoAm	-0.0113446	(-0.02, 0.00)	0.0116271	0.744135
No Cell-Adjustment	Daidzein	Hannum	0.476343	( 0.13, 0.82)	0.0128656	0.823396
No Cell-Adjustment	Cotinine	PhenoAge	0.747017	( 0.18, 1.32)	0.0155647	0.996139
No Cell-Adjustment	Cadmium	Hannum	0.445829	( 0.10, 0.79)	0.0173081	1
No Cell-Adjustment	Equol	GrimAge	-0.443675	(-0.79, -0.10)	0.0183343	1
No Cell-Adjustment	PCB118	DunedinPoAm	-0.0123761	(-0.02, 0.00)	0.0183734	1
No Cell-Adjustment	Lead	GrimAge2	0.469038	( 0.10, 0.84)	0.0184121	1
No Cell-Adjustment	Equol	GrimAge2	-0.434053	(-0.78, -0.09)	0.0194634	1
No Cell-Adjustment	o-Desmethylangolensin (O-DMA)	DunedinPoAm	-0.0121128	(-0.02, 0.00)	0.0220478	1
No Cell-Adjustment	Mono-benzyl phthalate	SkinBlood	0.68793	( 0.12, 1.26)	0.0240308	1
No Cell-Adjustment	Mono-benzyl phthalate	Hannum	0.896822	( 0.15, 1.65)	0.0243612	1
No Cell-Adjustment	3,3',4,4',5-Pentachlorobiphenyl (pncb)	DunedinPoAm	-0.0113316	(-0.02, 0.00)	0.029033	1
No Cell-Adjustment	Equol	DNAmTL	0.021308	( 0.00, 0.04)	0.0298659	1
No Cell-Adjustment	PCB138	DunedinPoAm	-0.00952425	(-0.02, 0.00)	0.0324473	1
No Cell-Adjustment	Cadmium, urine	PhenoAge	0.919638	( 0.09, 1.75)	0.0338083	1
No Cell-Adjustment	Dimethylthiophosphate	Hannum	0.656204	( 0.06, 1.25)	0.0340155	1
No Cell-Adjustment	Cadmium, urine	DunedinPoAm	0.0189822	( 0.00, 0.04)	0.037572	1
No Cell-Adjustment	Cotinine	Hannum	0.445464	( 0.03, 0.86)	0.0380973	1
No Cell-Adjustment	2,3,4,7,8-Pentachlorodibenzofuran (pncdf)	DunedinPoAm	-0.00839248	(-0.02, 0.00)	0.0414513	1
No Cell-Adjustment	Mono-benzyl phthalate	Horvath	0.582478	( 0.02, 1.14)	0.0425875	1
No Cell-Adjustment	PCB138	Hannum	-0.616489	(-1.21, -0.02)	0.044546	1
No Cell-Adjustment	1,2,3,4,6,7,8,9-Octachlorodibenzo-p-dioxin (ocdd)	Horvath	-0.572526	(-1.14, -0.01)	0.0483643	1
